# Supplementary material for: Annotation and Expression of IDN2-like and FDM-like Genes in Sexual and Aposporous Hypericum perforatum L. accessions
Source: MDPI journal article supplement (doi:10.3390/plants8060158), 2019-06-07
Supplement: s1 [file s1]

# Annotation and Expression of IDN2-like and FDM-like Genes in Sexual and Aposporous *Hypericum perforatum* L. accessions

Andrea Basso, Gianni Barcaccia and Giulio Galla \*

Laboratory of Genetics and Genomics, DAFNAE, University of Padova, Campus of Agripolis, Viale dell'Università, 1635020 Legnaro, Italy; andrea.basso@unipd.it (A.B.); gianni.barcaccia@unipd.it (G.B.)

\* Correspondence: giulio.galla@unipd.it

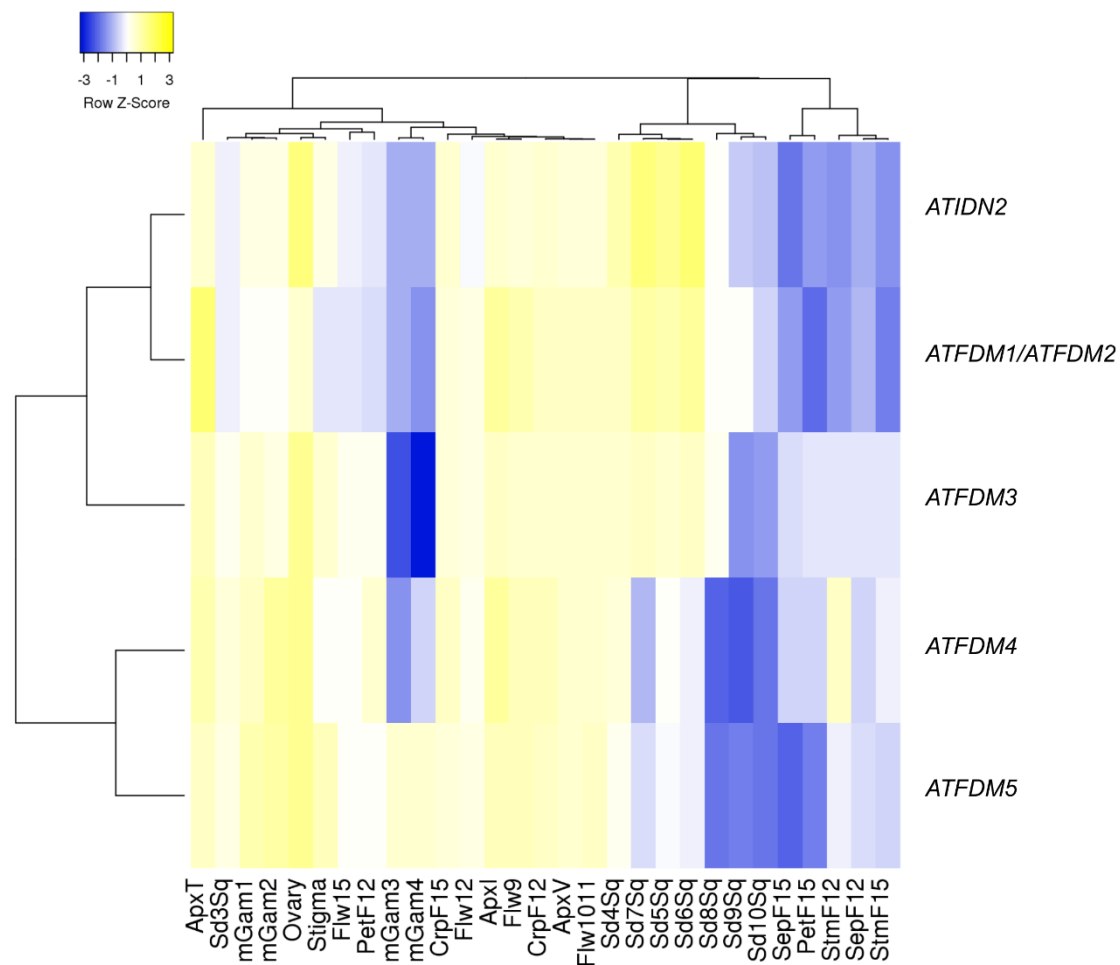

**Figure 1.** IDN2 and FDM1-5 gene expression in Arabidopsis. Heat map showing the expression of IDN2 and FDM1-5 genes in Arabidopsis lower flower parts, seeds, male gametes and meristems. Gene expression data were retrieved as the average expression of replicate treatments relative to average of the appropriate control from ([http://bar.utoronto.ca/affydb/cgi-bin/affy\\_db\\_exprss\\_browser\\_in.cgi](http://bar.utoronto.ca/affydb/cgi-bin/affy_db_exprss_browser_in.cgi)). Sample and genes were clustered by using the Pearson Correlation Coefficient and average linkage options.

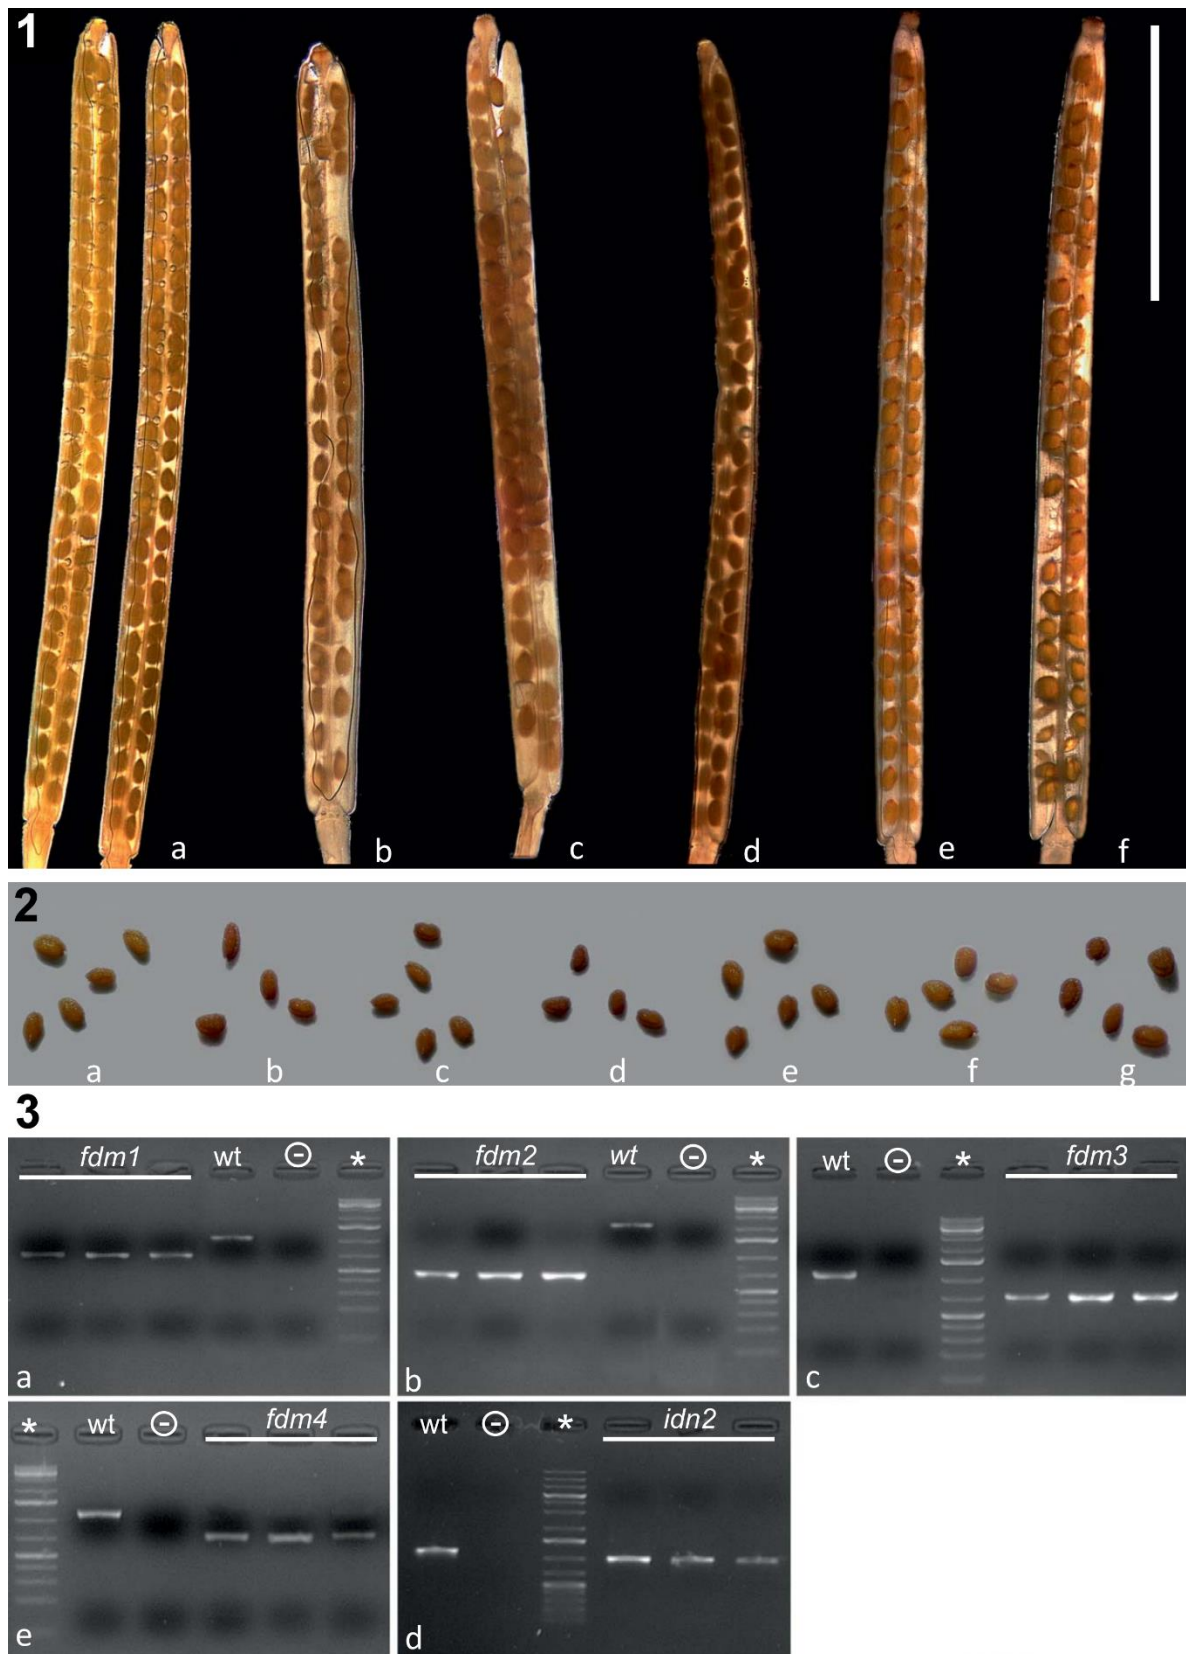

**Figure 2.** Panel 1: representative images of *Arabidopsis thaliana* wild type and mutant siliques. a: wild type; b: *fdm1*; c: *fdm2*; d: *fdm3*; e: *fdm4*; f: *idn2*; scale bar= 5mm. Panel 2: representative images of *Arabidopsis thaliana* wild type and mutant seeds: a: wild type; b: *fdm1*; c: *fdm2*; d: *fdm3*; e: *fdm4*; f: *fdm5*; g: *idn2*. Panel 3. Genotyping of KanR plants by PCR and by using primer combinations: LP/RP and LBb1.3. a: *fdm1*; b: *fdm2*; c: *fdm3*; d: *fdm4*; e: *idn2*; -: negative control; wt: wild type; \*: 1kb GeneRuler 1 kb Plus DNA Ladder (Thermo Fisher Scientific).



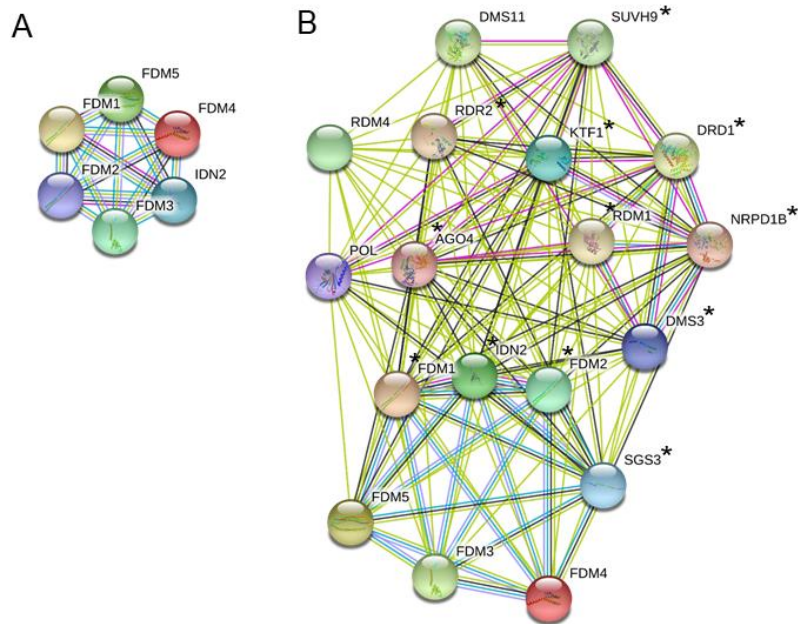

**Figure 5.** Known and predicted interactions between Arabidopsis IDN2 and FDM1-5 proteins. A: IDN2, FDM1-5 proteins interaction network. Nodes represent *A. thaliana* IDN2, FDM1-5 proteins, while edges represent predicted or experimentally determined protein-protein interactions. The average local clustering coefficient is 0.876. The PPI enrichment p-value is  $\leq 1.0e-16$ . B: Known and predicted interactors of Arabidopsis IDN2 and FDM1-5 proteins. B: The network was generated by including IDN2, FDM1-5 proteins and the of up to 12 predicted interactors. Interactions colour legend: Blue: curated databases; pink: experimentally determined; black: co-expression analysis; Yellow: text mining. The PPI enrichment p-value is  $\leq 1.0e-16$ . Proteins known to be involved in RdDM are marked with \*.
